# Supplementary material for: Quantitative Structure-Activity Relationship Model to Predict Antioxidant Effects of the Peptide Fraction Extracted from a Co-Culture System of Chlorella pyrenoidosa and Yarrowia lipolytica
Source: MDPI journal article supplement (doi:10.3390/md17110633), 2019-11-08
Supplement: s1 [file s1]

**Table S3.** Distribution of peptides with different molecular weights

| Molecular weight (Da) | Number of peptides |
|-----------------------|--------------------|
| 500-1000              | 90                 |
| 1000-1500             | 393                |
| 1500-2000             | 232                |
| 2000-2500             | 84                 |
| 2500-3000             | 20                 |
| 3000-3600             | 17                 |
