# Supplementary material for: Quantitative Structure-Activity Relationship Model to Predict Antioxidant Effects of the Peptide Fraction Extracted from a Co-Culture System of Chlorella pyrenoidosa and Yarrowia lipolytica
Source: MDPI journal article supplement (doi:10.3390/md17110633), 2019-11-08
Supplement: s1 [file s1]

**Table S1.** Primer sequences of target and reference genes

| The name of primer   | sequence            |
|----------------------|---------------------|
| SOD-F                | TCTATCCAGAAAACACG   |
| SOD-R                | ATTACACCACAAGCCAA   |
| CAT-F                | ATGGGGAGGCAGTTTATT  |
| CAT-R                | GAGAGGGTAGTCCTTG TG |
| GSHP <sub>x</sub> -F | GAGAACGCCAAGAACGAA  |
| GSHP <sub>x</sub> -R | CGGAGACCAGGTGATGAG  |
| Nrf2-F               | GCGACGGAAAGAGTATGA  |
| Nrf2-R               | ACTGGATGTGCTGGGCTG  |
| KEAP1-F              | GGGCGAGAAGTGTGTC    |
| KEAP1-R              | CAGCGAAGTTGGCGAT    |
| GAPDH-F              | CCACTCCTCCACCTT TG  |
| GAPDH-R              | CACCACCCTGTTGCTGT   |
